# Supplementary material for: Highly Flexible and Broad-Range Mechanically Tunable All-Wood Hydrogels with Nanoscale Channels via the Hofmeister Effect for Human Motion Monitoring
Source: PubMed Central journal article supplement (PMC8964865; doi:10.1007/s40820-022-00827-3), 2022-03-29
Supplement: 40820_2022_827_MOESM1_ESM.pdf [file 40820_2022_827_MOESM1_ESM.pdf]

Supporting Information for

# Highly Flexible and Broad-Range Mechanically Tunable All-Wood Hydrogels with Nanoscale Channels via the Hofmeister Effect for Human Motion Monitoring

Guihua Yan<sup>1</sup>, Shuaiming He<sup>2,\*</sup>, Gaofeng Chen<sup>1</sup>, Sen Ma<sup>1</sup>, Anqi Zeng<sup>1</sup>, Binglin Chen<sup>1</sup>, Shuliang Yang<sup>1</sup>, Xing Tang<sup>1</sup>, Yong Sun<sup>1</sup>, Feng Xu<sup>3</sup>, Lu Lin<sup>1,\*</sup>, and Xianhai Zeng<sup>1,\*</sup>

<sup>1</sup> College of Energy, Xiamen University, Xiamen 361102, P. R. China

<sup>2</sup> State Key Laboratory of Pulp and Paper-making Engineering, South China University of Technology, Guangzhou 510640, P. R. China

<sup>3</sup> Beijing Key Laboratory of Lignocellulosic Chemistry, Beijing Forestry University, No. 35, Tsinghua East Road, Haidian, Beijing 100083, P. R. China

\*Corresponding authors. E-mail: [he.shuaiming@gmail.com](mailto:he.shuaiming@gmail.com) (Shuaiming He), [lulin@xmu.edu.cn](mailto:lulin@xmu.edu.cn) (Lu Lin), [xianhai.zeng@xmu.edu.cn](mailto:xianhai.zeng@xmu.edu.cn) (Xianhai Zeng)

## Supplementary Figures and Tables

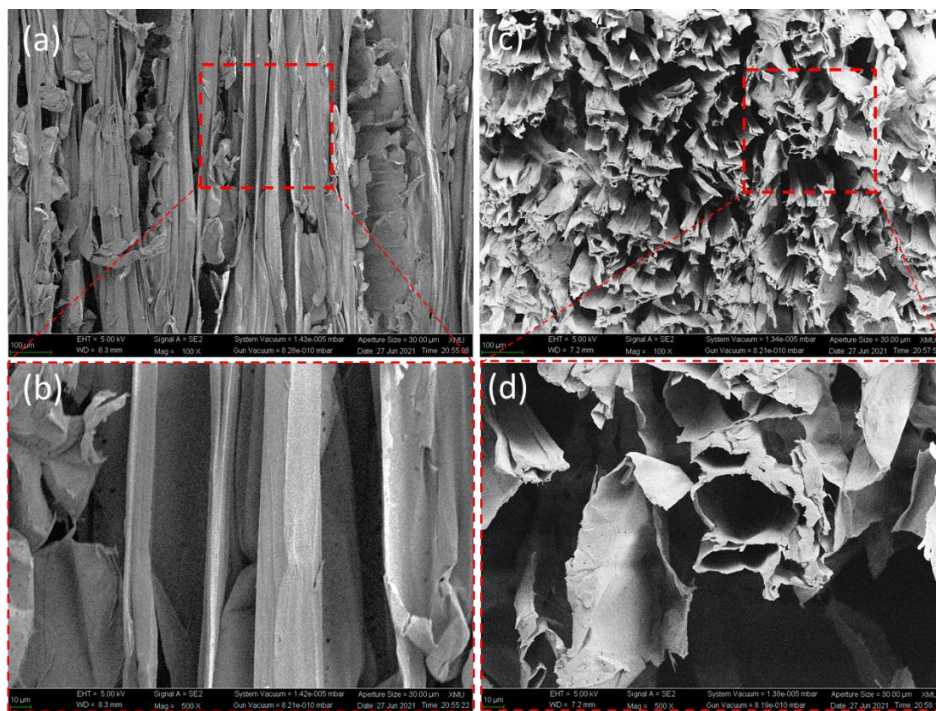

**Fig. S1** Morphologies of the white wood from the (a) side-view and (b) its magnified image; and from the (c) top-view and (d) its magnified image. The SEM images show the loose structure between the cellulose fibers

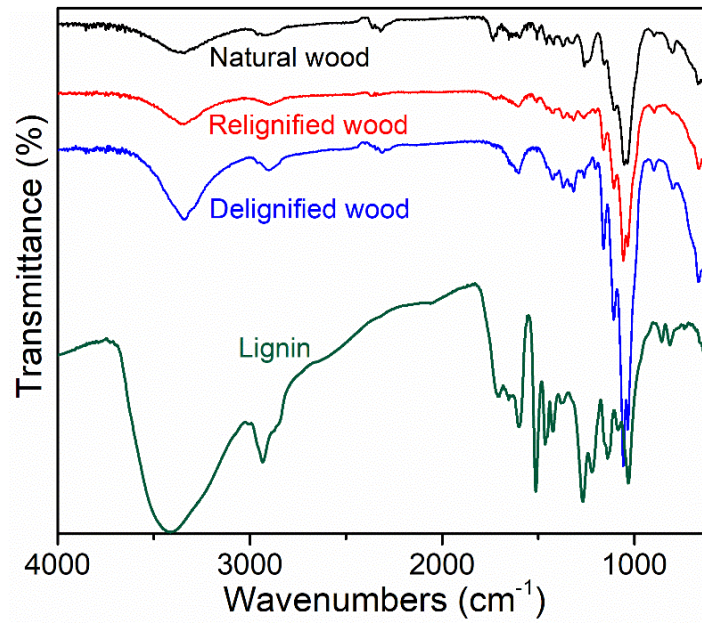

**Fig. S2** FTIR spectra of the natural wood, delignified wood, and relignified wood

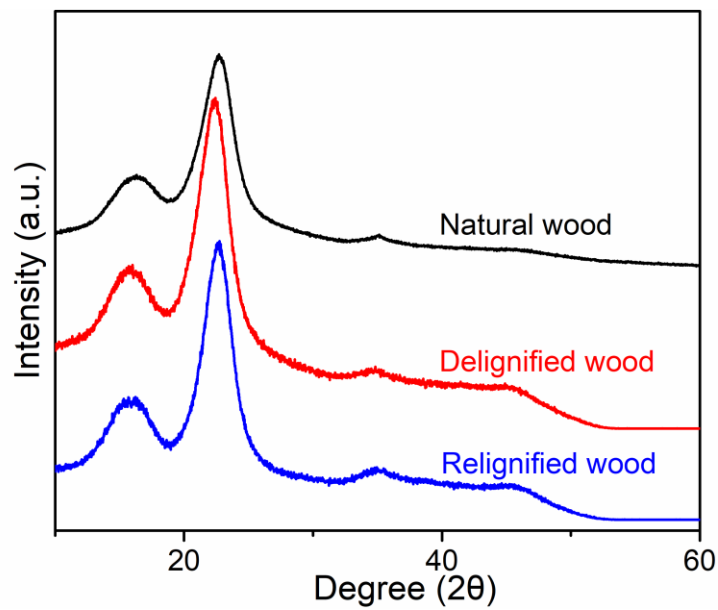

**Fig. S3** XRD spectra of the natural wood, delignified wood, and relignified wood

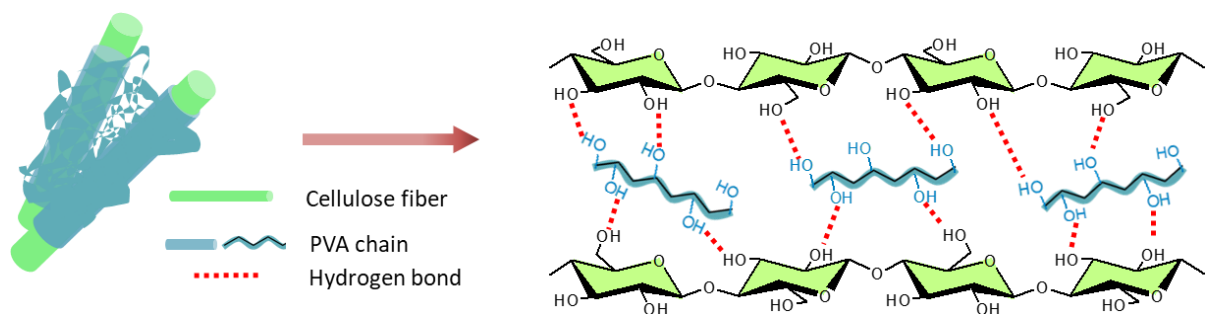

**Fig. S4** The structural linkage of the white wood hydrogel between cellulose fibers and PVA chains

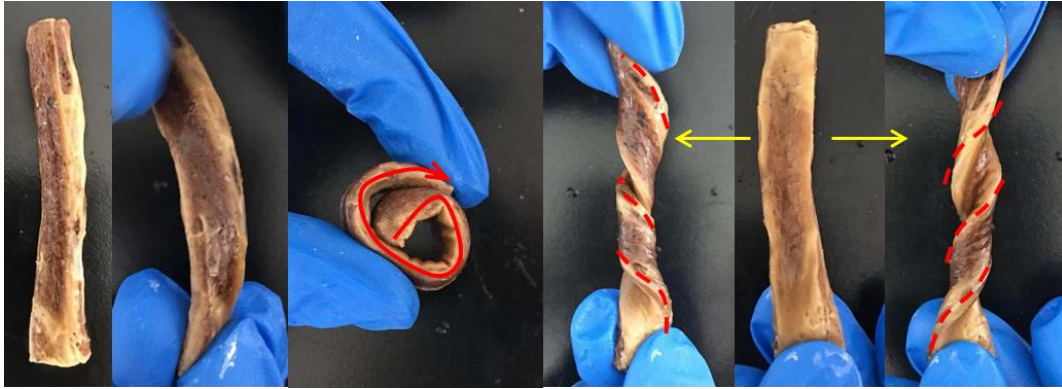

**Fig. S5** Digital images of the all-wood hydrogel with a thickness of 3 mm

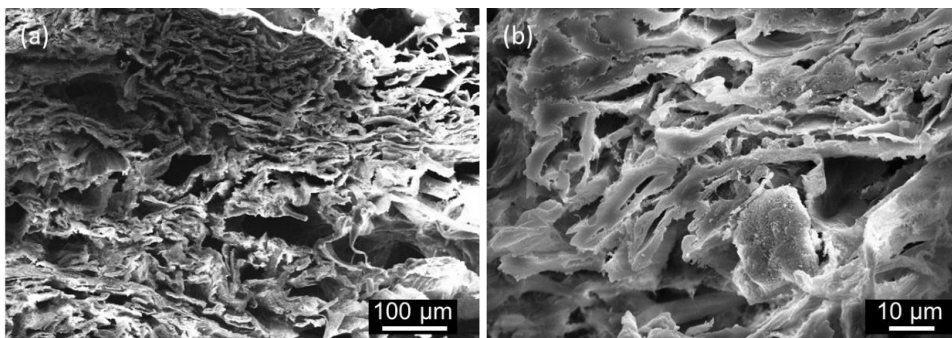

**Fig. S6** Cross-section view of the all-wood hydrogel subjected to bending. Note that the partially open, crumpled cell wall structure in the all-wood hydrogel creates space to accommodate various deformations

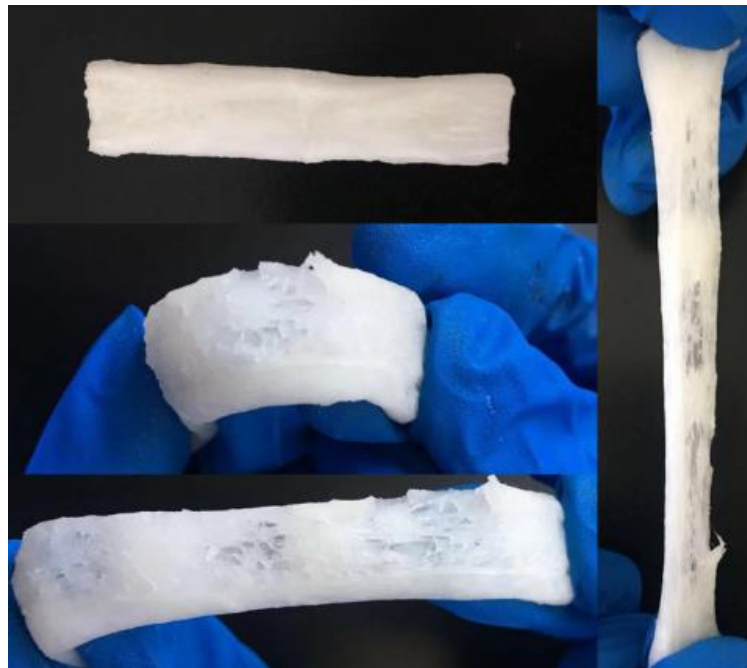

**Fig. S7** Digital images of the white wood hydrogel. Note that the white wood hydrogel exhibited significant breakage under external tension



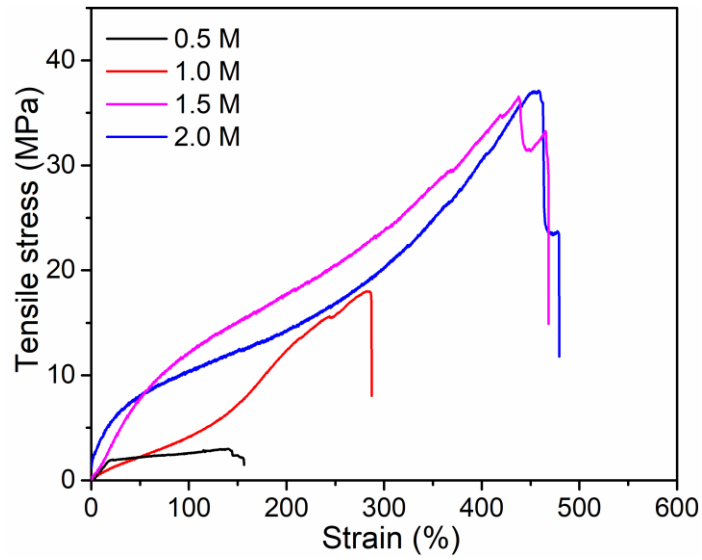

**Fig. S8** The effect of sodium sulfate concentration on the tensile strength of the all-wood hydrogel

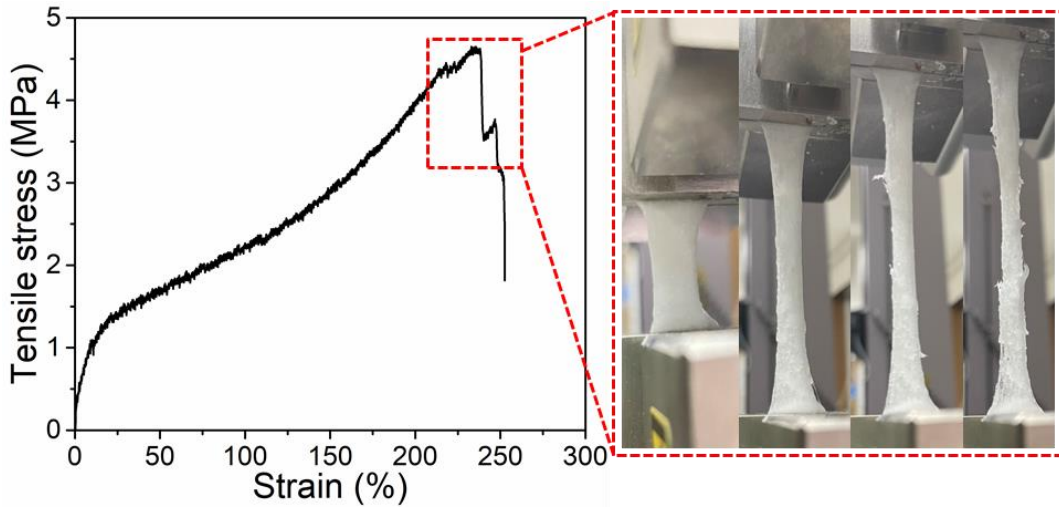

**Fig. S9** The tensile strength of the white wood hydrogel without lignin

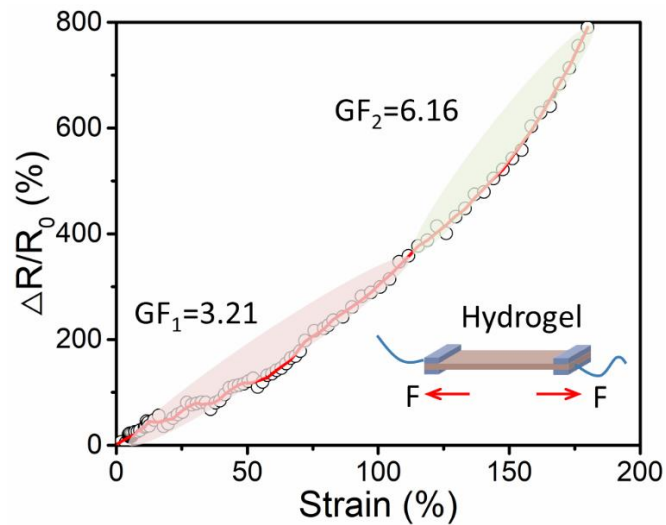

**Fig. S10** Relative resistance variation curves of the all-wood hydrogel as the strain

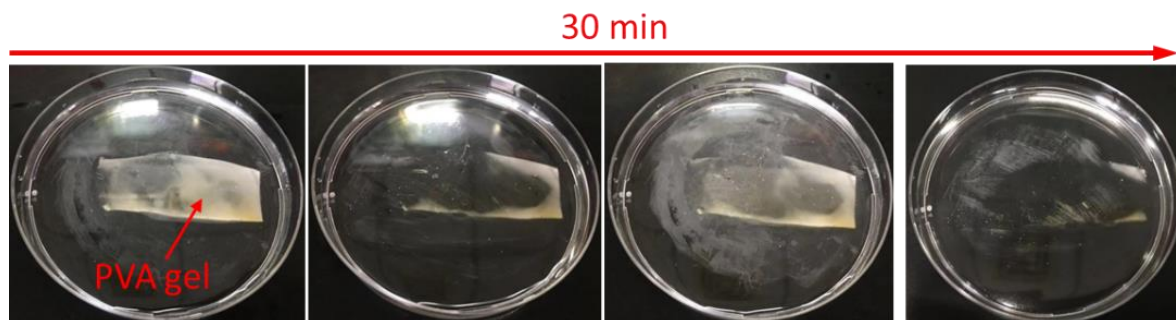

**Fig. S11** The images of the PVA gel when salting out in the water for 30 min

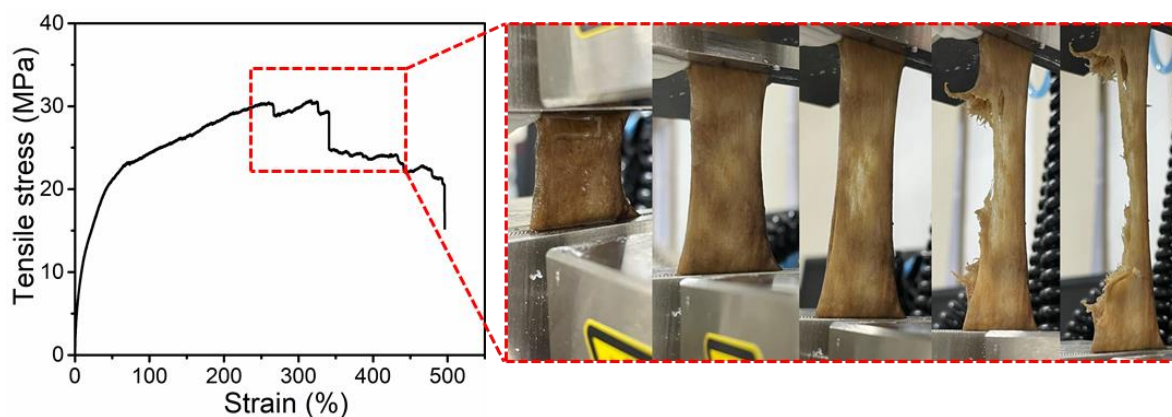

**Fig. S12** The tensile strength of the all-wood hydrogel after 5 min of salting in water

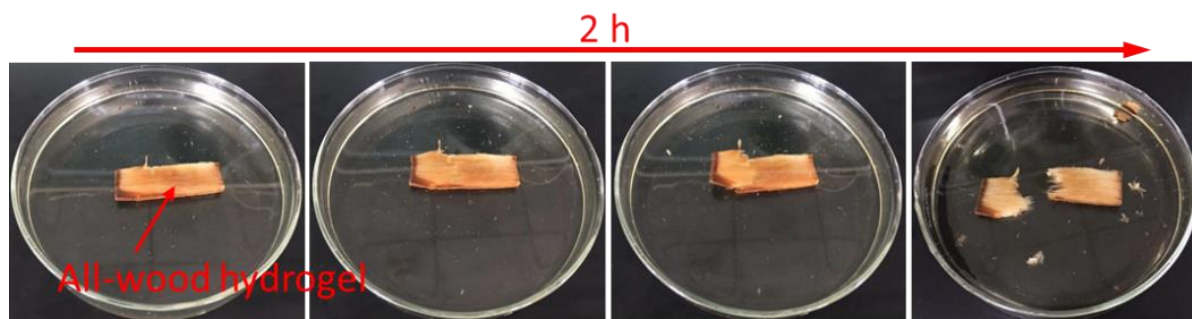

**Fig. S13** The images of the all-wood hydrogel when salting out in the water for 2 h

**Table S1** The chemical compositions of the all-wood hydrogel, including cellulose, hemicellulose, and lignin after resetting the lignin into the white wood for different times

| Reset times of lignin | Cellulose (wt%) | Hemicellulose (wt%) | Lignin (wt%) |
|-----------------------|-----------------|---------------------|--------------|
| 1                     | 60.55           | 27.05               | 3.9          |
| 2                     | 59.51           | 27.05               | 8.7          |
| 3                     | 65.25           | 25.52               | 12.1         |

**Notes:** The lignin was obtained from the natural wood by delignification process. The collected lignin was then refilled into the microscopic channels of the white wood.

**Table S2** Composition of various full-wood hydrogels with different lignin content, PVA content, Na<sub>2</sub>SO<sub>4</sub> concentration, and salting time in the 1.5 M sodium sulfate solution

| Hydrogels            | White wood (g) | Lignin/all-wood (wt%) | PVA (g)    | Na <sub>2</sub> SO <sub>4</sub> (mol L <sup>-1</sup> ) | Salting time in Na <sub>2</sub> SO <sub>4</sub> (days) | Water (mL) |
|----------------------|----------------|-----------------------|------------|--------------------------------------------------------|--------------------------------------------------------|------------|
| All-wood hydrogels   | 0.2            | <b>3.9</b>            | 1.0        | 1.5                                                    | 4                                                      | 10         |
|                      | 0.2            | <b>8.7</b>            | 1.0        | 1.5                                                    | 4                                                      | 10         |
|                      | 0.2            | <b>12.1</b>           | 1.0        | 1.5                                                    | 4                                                      | 10         |
|                      | 0.2            | 8.7                   | <b>0.2</b> | 1.5                                                    | 4                                                      | 10         |
|                      | 0.2            | 8.7                   | <b>0.5</b> | 1.5                                                    | 4                                                      | 10         |
|                      | 0.2            | 8.7                   | <b>1.0</b> | 1.5                                                    | 4                                                      | 10         |
|                      | 0.2            | 8.7                   | <b>1.5</b> | 1.5                                                    | 4                                                      | 10         |
|                      | 0.2            | 8.7                   | 1.0        | <b>0.5</b>                                             | 4                                                      | 10         |
|                      | 0.2            | 8.7                   | 1.0        | <b>1.0</b>                                             | 4                                                      | 10         |
|                      | 0.2            | 8.7                   | 1.0        | <b>1.5</b>                                             | 4                                                      | 10         |
|                      | 0.2            | 8.7                   | 1.0        | <b>2.0</b>                                             | 4                                                      | 10         |
|                      | 0.2            | 8.7                   | 1.0        | 1.5                                                    | <b>1</b>                                               | 10         |
|                      | 0.2            | 8.7                   | 1.0        | 1.5                                                    | <b>4</b>                                               | 10         |
| 0.2                  | 8.7            | 1.0                   | 1.5        | <b>7</b>                                               | 10                                                     |            |
| White wood hydrogels | 0.2            | 0                     | 1.0        | 1.5                                                    | 4                                                      | 10         |
| PVA hydrogels        | 0              | 0                     | 1.0        | 1.5                                                    | 4                                                      | 10         |
